# Supplementary material for: Structure–activity relationship studies on CXCR4 antagonists having cyclic pentapeptide scaffolds
Source: Royal Society of Chemistry journal article supplement (doi:10.1039/b513145f), 2005-01-01
Supplement: b513145f.pdf [file b513145f.pdf]

Table S1. Characterization data (MS) of novel synthetic compounds

| Compd.    | Formula                                                          | HRMS (MH) <sup>+</sup> <sup>a</sup> |          |
|-----------|------------------------------------------------------------------|-------------------------------------|----------|
|           |                                                                  | Calcd.                              | Found    |
| <b>2</b>  | C <sub>33</sub> H <sub>40</sub> N <sub>8</sub> O <sub>6</sub>    | 645.3149                            | 645.3155 |
| <b>3</b>  | C <sub>34</sub> H <sub>43</sub> N <sub>9</sub> O <sub>6</sub>    | 674.3415                            | 674.3420 |
| <b>4</b>  | C <sub>35</sub> H <sub>45</sub> N <sub>9</sub> O <sub>6</sub>    | 688.3571                            | 688.3562 |
| <b>5</b>  | C <sub>36</sub> H <sub>47</sub> N <sub>9</sub> O <sub>6</sub>    | 702.3728                            | 702.3737 |
| <b>6</b>  | C <sub>35</sub> H <sub>45</sub> N <sub>11</sub> O <sub>6</sub>   | 716.3633                            | 716.3624 |
| <b>7</b>  | C <sub>37</sub> H <sub>49</sub> N <sub>11</sub> O <sub>6</sub>   | 744.3946                            | 744.3940 |
| <b>8</b>  | C <sub>35</sub> H <sub>42</sub> N <sub>8</sub> O <sub>8</sub>    | 703.3204                            | 703.3208 |
| <b>9</b>  | C <sub>36</sub> H <sub>45</sub> N <sub>11</sub> O <sub>6</sub>   | 728.3633                            | 728.3626 |
| <b>10</b> | C <sub>36</sub> H <sub>45</sub> N <sub>11</sub> O <sub>6</sub>   | 728.3633                            | 728.3636 |
| <b>11</b> | C <sub>26</sub> H <sub>41</sub> N <sub>11</sub> O <sub>6</sub>   | 604.3320                            | 604.3310 |
| <b>12</b> | C <sub>34</sub> H <sub>46</sub> N <sub>12</sub> O <sub>6</sub>   | 719.3742                            | 719.3745 |
| <b>13</b> | C <sub>35</sub> H <sub>46</sub> N <sub>12</sub> O <sub>6</sub>   | 731.3742                            | 731.3732 |
| <b>14</b> | C <sub>33</sub> H <sub>44</sub> N <sub>12</sub> O <sub>6</sub> S | 737.3306                            | 737.3298 |
| <b>15</b> | C <sub>33</sub> H <sub>44</sub> N <sub>12</sub> O <sub>6</sub> S | 736.3306                            | 737.3322 |
| <b>16</b> | C <sub>30</sub> H <sub>43</sub> N <sub>11</sub> O <sub>5</sub>   | 638.3527                            | 638.3510 |
| <b>17</b> | C <sub>36</sub> H <sub>48</sub> N <sub>12</sub> O <sub>5</sub>   | 729.3949                            | 729.3933 |
| <b>18</b> | C <sub>37</sub> H <sub>49</sub> N <sub>11</sub> O <sub>6</sub>   | 744.3946                            | 744.3952 |
| <b>19</b> | C <sub>33</sub> H <sub>45</sub> N <sub>13</sub> O <sub>5</sub>   | 704.3745                            | 704.3748 |
| <b>20</b> | C <sub>36</sub> H <sub>47</sub> N <sub>11</sub> O <sub>5</sub>   | 714.3840                            | 714.3849 |
| <b>21</b> | C <sub>36</sub> H <sub>46</sub> FN <sub>11</sub> O <sub>5</sub>  | 732.3746                            | 732.3732 |
| <b>22</b> | C <sub>37</sub> H <sub>47</sub> N <sub>11</sub> O <sub>6</sub>   | 742.3789                            | 742.3784 |
| <b>23</b> | C <sub>39</sub> H <sub>43</sub> FN <sub>8</sub> O <sub>6</sub>   | 739.3368                            | 739.3361 |
| <b>24</b> | C <sub>36</sub> H <sub>46</sub> FN <sub>11</sub> O <sub>5</sub>  | 732.3746                            | 732.3739 |
| <b>25</b> | C <sub>36</sub> H <sub>46</sub> FN <sub>11</sub> O <sub>5</sub>  | 732.3746                            | 732.3749 |
| <b>26</b> | C <sub>36</sub> H <sub>46</sub> FN <sub>11</sub> O <sub>5</sub>  | 732.3746                            | 732.3758 |
| <b>27</b> | C <sub>36</sub> H <sub>46</sub> FN <sub>11</sub> O <sub>5</sub>  | 732.3746                            | 732.3762 |
| <b>28</b> | C <sub>36</sub> H <sub>47</sub> N <sub>11</sub> O <sub>6</sub>   | 730.3789                            | 730.3800 |

<sup>a</sup>FAB-exact mass (HRMS) spectra were recorded on a JEOL JMS-01SG-2 or JMS-HX/HX 110A mass spectrometer.
